# Supplementary material
Source: PubMed Central journal article supplement (PMC2644821)
Supplement: NIHMS90607-supplement-1.pdf [file NIHMS90607-supplement-1.pdf]

Isshiki *et al.* Role of SOCS2 in diabetic nephropathy

1  
2  
3 phosphorylation by insulin (n=3~6, mean±SD, \*p<0.05 vs. GFP, SOCS2 with insulin  
4 stimulation).  
5  
6  
7  
8  
9

10 Figure 9. Downregulation of STAT5 expression in diabetic states. (A) Affymatrix gene array  
11 analysis revealed STAT5a mRNA expression was decreased in glomeruli from diabetic rats  
12 (STZ) that was normalized by islet transplantation (ICT). (B) Immunoblotting confirmed the  
13 reduced STAT5 protein expression in diabetic states that was reversed by insulin treatment. (C).  
14 Expression of STAT5 protein in cultured mesangial cells grown in media containing 5.6 or 27.8  
15 mM of glucose with or without 100 nM of insulin for 3 days (n=5, p<0.05 vs. without insulin).  
16  
17  
18  
19  
20  
21  
22  
23  
24  
25  
26  
27  
28

29 Supplemental Figure 1. Effects of islet cell transplantation (ICT) on the plasma blood glucose  
30 (A) and body weight (B) in diabetic rats.  
31  
32  
33  
34  
35

36 Supplemental Figure 2: Expression of SOCS2 protein glomerular tissues isolated from control  
37 rats or rats with 8 weeks of diabetes with or without ICT treatment for 4 weeks.  
38  
39  
40  
41  
42

43 Supplemental Figure 3: The inhibitory effect of SOCS2 on IGF-1-induced Tyr317  
44 phosphorylation of p66Shc was rescued by transfection of RNAi targeting to SOCS2.  
45  
46  
47  
48  
49

50 Supplemental database. List of genes of which their glomerular expression was changed by  
51 diabetes and normalized by islet cell transplantation (ICT).  
52  
53  
54  
55  
56  
57  
58  
59  
60

Supplemental Figure 1

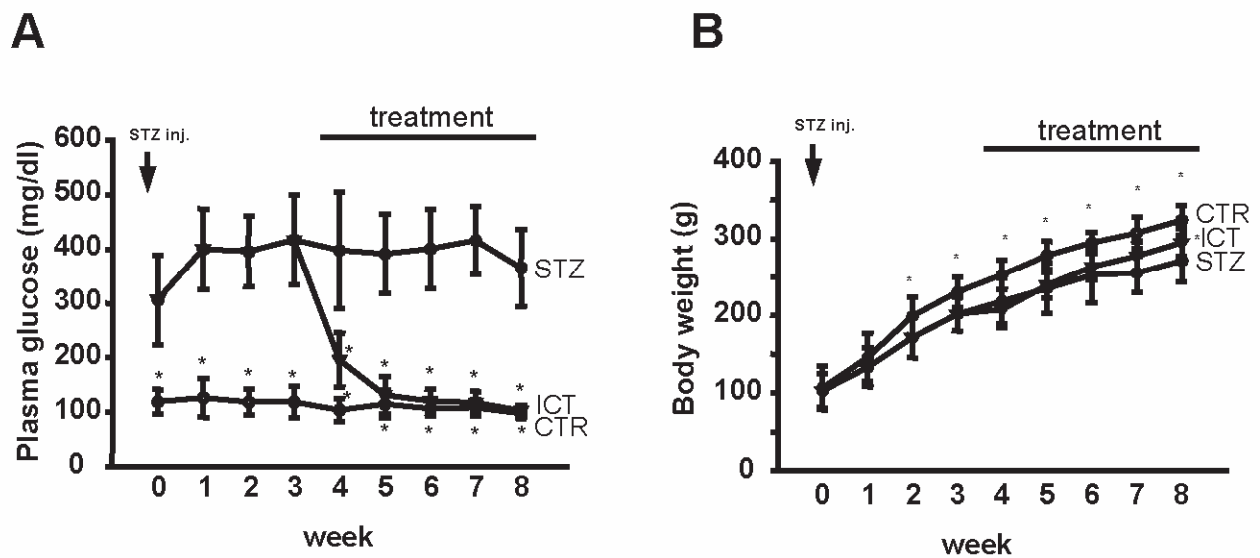

1  
2  
3  
4  
5  
6  
7  
8  
9  
10  
11  
12  
13  
14  
15  
16  
17  
18  
19  
20  
21  
22  
23  
24  
25  
26  
27  
28  
29  
30  
31  
32  
33  
34  
35  
36  
37  
38  
39  
40  
41  
42  
43  
44  
45  
46  
47  
48  
49  
50  
51  
52  
53  
54  
55  
56  
57  
58  
59  
60

Supplemental figure 2

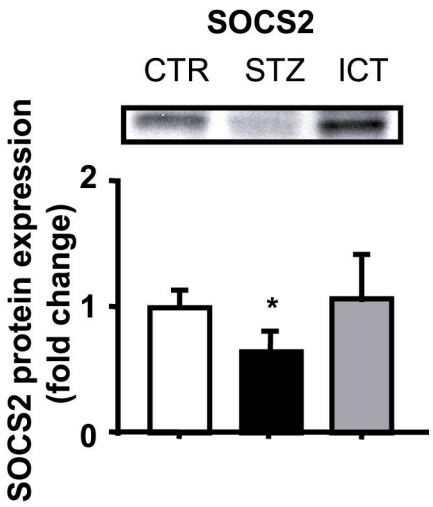

## Supplemental Figure 3

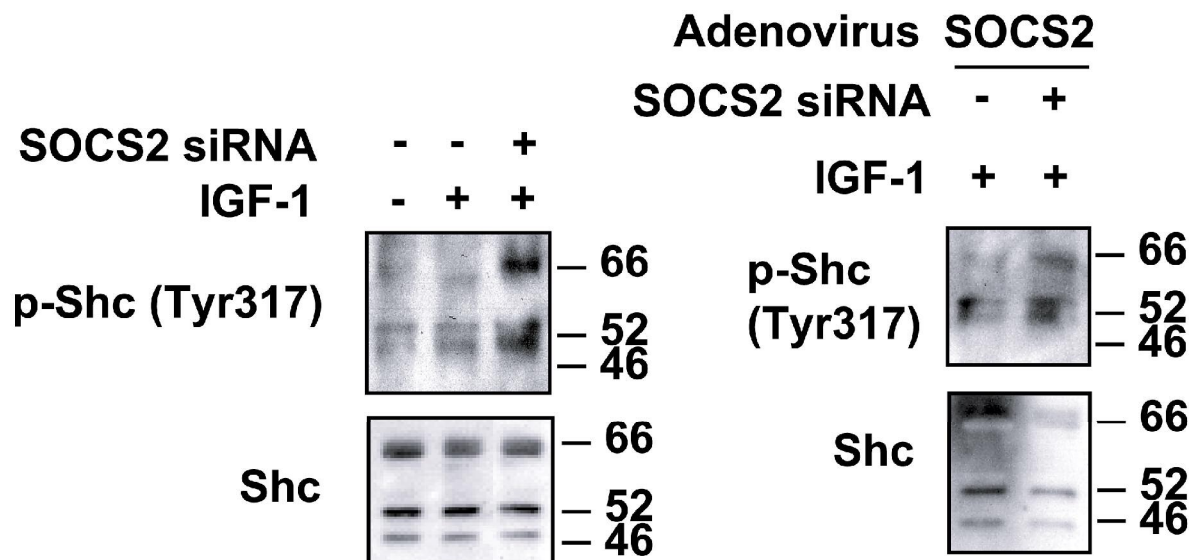

Supplemental ~~data~~

32 Up-regulated genes that were normalized by ICT

|          |          |                                                                                                                         |
|----------|----------|-------------------------------------------------------------------------------------------------------------------------|
| V01244   | 20.22534 | prolactin, exon 1 and joined CDS                                                                                        |
| AI236945 | 8.84695  | EST                                                                                                                     |
| AF029105 | 8.745635 | Mint1 mRNA                                                                                                              |
| U16025   | 8.551708 | class Ib RT1 mRNA                                                                                                       |
| X95188   | 8.135587 | Pristanoyl-CoA Oxidase                                                                                                  |
| AI639103 | 7.809445 | EST                                                                                                                     |
| AA944973 | 7.080628 | EST                                                                                                                     |
| D10666   | 6.898991 | neural visinin-like protein (NVP)                                                                                       |
| X62404   | 6.766376 | epididymal secretory glutathione peroxidase                                                                             |
| J04215   | 6.515762 | cell-binding bone sialoprotein mRNA                                                                                     |
| AF037199 | 6.341748 | zinc finger transcription factor REST protein mRNA<br>type II cAMP-dependent protein kinase regulatory subunit mRNA, 3' |
| M12492   | 6.174707 | end                                                                                                                     |
| X15939   | 6.058593 | beta cardiac myosin heavy chain                                                                                         |
| AB005541 | 5.955455 | PCTAIRE3                                                                                                                |
| D28110   | 5.905095 | MOBP (myelin-associated oligodendrocytic basic protein)                                                                 |
| D14447   | 5.795889 | Max mRNA                                                                                                                |
| X07551   | 5.578966 | MHC RT1.B-alpha gene for class II antigen exons 2-5                                                                     |
| M58169   | 5.383381 | 22-kD glycoprotein mRNA                                                                                                 |
| K03486   | 5.35897  | protein kinase C type III (PKC alpha)                                                                                   |
| Y12178   | 5.3448   | bilitranslocase                                                                                                         |
| AA892010 | 5.331553 | EST                                                                                                                     |
| X14254   | 5.324965 | MHC class II-associated invariant chain                                                                                 |
| AA799554 | 5.309606 | EST                                                                                                                     |
| AF039832 | 5.295859 | homeobox protein (rPtx2) mRNA                                                                                           |
| D29646   | 5.200252 | ADP-ribosyl cyclase_/ cyclic ADP-ribose hydrolase (CD38)                                                                |
| AA893666 | 5.183569 | EST                                                                                                                     |
| D00729   | 5.151611 | delta3, delta2-enoyl-CoA isomerase                                                                                      |
| S66545   | 5.110997 | putative alkaline phosphatase [rats, mRNA, 2602 nt]                                                                     |
| AI011376 | 5.079766 | EST                                                                                                                     |
| AA859928 | 5.062076 | EST                                                                                                                     |
| U90215   | 5.035043 | polysialyltransferase mRNA                                                                                              |
| U80915   | 5.034253 | EAAT4 Na <sup>+</sup> -dependent glutamate transporter protein mRNA                                                     |

## 69 Down-regulated genes that were normalized by ICT

|           |       |                                                              |                                                                                |
|-----------|-------|--------------------------------------------------------------|--------------------------------------------------------------------------------|
| AA800639  | 25.43 | EST                                                          |                                                                                |
|           |       |                                                              | calcium and DAG-regulated guanine nucleotide exchange factor II mRNA, complete |
| AF081196  | 20.71 | cds                                                          |                                                                                |
| Z27513    | 20.19 | RNCPSIX38                                                    | carbamoylphosphate synthase I, exon 38                                         |
| AA858586  | 13.82 | EST                                                          |                                                                                |
| M14775    | 12.46 | cytochrome P-450                                             | polypeptide mRNA, partial cds                                                  |
| X62839    | 11.66 | RRPCP3120                                                    | potassium channel protein (3120 bp)                                            |
| M58716    | 11.12 | zymogen granule membrane protein GP-2                        | mRNA, complete cds                                                             |
| AA875215  | 10.78 | EST                                                          |                                                                                |
| AI639251  | 10.60 | EST                                                          |                                                                                |
| X15143cds | 10.36 | beta A3/A1                                                   | crystallin                                                                     |
| M60811cds | 10.06 | (LxRN1) LINE 1 repeat element,                               | ORF II                                                                         |
| AF004953  | 9.86  | chondroadherin                                               | mRNA, complete cds                                                             |
| AI145494  | 9.58  | EST                                                          |                                                                                |
| D12978cds | 9.49  | RATOCT1                                                      | octamer binding protein                                                        |
| L31546cds | 9.28  | serotonin 5HT-2 receptor gene,                               | complete cds                                                                   |
| X90710    | 8.56  | alcohol dehydrogenase                                        | protein                                                                        |
| U69109    | 8.29  | calcium-dependent tyrosine kinase                            | mRNA, complete cds                                                             |
| M63901    | 8.11  | neuroendocrine protein 7B2                                   | mRNA, complete cds                                                             |
| J02852    | 8.01  | cytochrome P450 IIA3                                         | mRNA, 3' end                                                                   |
| X52772cds | 7.96  | RP65 p65                                                     | mRNA                                                                           |
| L13407    | 7.82  | calcium/calmodulin-dependent protein kinase II delta subunit | mRNA, partial cds                                                              |
| S70804    | 7.81  | clone p6.1                                                   | transcript                                                                     |
| X67108    | 7.75  | brain-derived neurotrophic factor (exon IV)                  |                                                                                |
| AI639377  | 7.71  | EST                                                          |                                                                                |
| AA891969  | 7.65  | EST                                                          |                                                                                |
| AB001982  | 7.56  | growth hormone secretagogue receptor type 1a,                | partial cds                                                                    |
| M62641    | 7.56  | melanin concentrating hormone gene,                          | complete cds                                                                   |
| D21095    | 7.51  | CINC-2 beta,                                                 | complete cds                                                                   |
| AI009682  | 7.43  | EST                                                          |                                                                                |
| X76168    | 7.37  | connexin 30.3                                                |                                                                                |
| AA859777  | 7.33  | EST                                                          |                                                                                |
| X52376cds | 7.26  | RSRDS retinal degradation slow (rds)                         | mRNA                                                                           |
| AF001953  | 7.25  | G protein beta 5 subunit                                     | mRNA, partial cds                                                              |
| U36899    | 7.25  | putative pheromone receptor VN2                              | mRNA, complete cds                                                             |

1  
2  
3  
4  
5  
6  
7  
8  
9  
10  
11  
12  
13  
14  
15  
16  
17  
18  
19  
20  
21  
22  
23  
24  
25  
26  
27  
28  
29  
30  
31  
32  
33  
34  
35  
36  
37  
38  
39  
40  
41  
42  
43  
44  
45  
46  
47  
48  
49  
50  
51  
52  
53  
54  
55  
56  
57  
58  
59  
60

|                 |             |                                                                            |
|-----------------|-------------|----------------------------------------------------------------------------|
| AA818097        | 7.18        | EST                                                                        |
| X86178mRNA      | 6.93        | RNDNAAZGP azgp1 gene                                                       |
| AF055065        | 6.83        | signal regulatory protein alpha mRNA, partial cds                          |
| AA893682        | 6.68        | EST                                                                        |
| AI639316        | 6.65        | EST                                                                        |
| L37966mRNA      | 6.38        | RATTCRAK T-cell receptor alpha-chain mRNA                                  |
| AA891242        | 6.35        | EST                                                                        |
| AF036761        | 6.27        | stearoyl-CoA desaturase 2 mRNA, partial cds                                |
| AI639317        | 6.26        | EST                                                                        |
| AF096291        | 6.15        | Bcl-w (bcl-w) mRNA, complete cds                                           |
| AA893781        | 6.12        | EST                                                                        |
| L27128          | 6.03        | stress activated protein kinase beta isoform mRNA, complete cds            |
| AA848831        | 6.02        | EST                                                                        |
| L13040          | 5.99        | calcitonin receptor C1b mRNA, complete cds                                 |
| AA859532        | 5.85        | EST                                                                        |
| <b>AF075382</b> | <b>5.81</b> | <b>suppressor of cytokine signaling-2 (SOCS-2) mRNA, complete cds</b>      |
| Y13413          | 5.71        | RNY13413 mRNA for Fe65L2 protein                                           |
| U14398          | 5.67        | synaptotagmin IV homolog mRNA, complete cds                                |
| M60737          | 5.65        | S-antigen mRNA, complete cds                                               |
| AA894337        | 5.63        | EST                                                                        |
| L43592          | 5.61        | protocadherin-3 (pcdh3) mRNA, complete cds                                 |
| U14398          | 5.61        | synaptotagmin IV homolog mRNA, complete cds                                |
| U77880          | 5.54        | rolipram-insensitive phosphodiesterase type 7 (RPDE7-1) mRNA, partial cds  |
| AI103671        | 5.46        | EST                                                                        |
| S81289          | 5.44        | IgM kappa chain variable region {CDR1 to CDR3 region}                      |
| AF035952        | 5.44        | kinesin-related protein KRP3 (KRP3) mRNA, partial cds                      |
| AF091565        | 5.41        | isolate QFG-TN1 olfactory receptor mRNA, partial cds                       |
| AI639515        | 5.36        | EST                                                                        |
| S75275          | 5.35        | RVLG=vasa-like gene protein [rats, Wistar-Imanishi, testis, mRNA, 3030 nt] |
| AA799764        | 5.26        | EST                                                                        |
| AI072770        | 5.24        | EST                                                                        |
| M57507          | 5.22        | guanyl cyclase (GC-S-beta-2) mRNA, complete cds                            |
| M10088cds       | 5.09        | RATENKB Rat prodynorphin (Preproenkephalin B) gene, major (3') exon        |
| D64046          | 5.04        | mRNA for phosphatidylinositol 3-kinase p85 beta subunit, complete cds      |
| AA893039        | 5.04        | EST                                                                        |
